# Supplementary material for: Metagenomic Investigation of Idiopathic Meningoencephalomyelitis in Dogs
Source: PubMed Central journal article supplement — J Vet Intern Med. 2017 Dec 2;32(1):324–30. doi: 10.1111/jvim.14877 (PMC5787199; doi:10.1111/jvim.14877), 2017-12-02
Supplement: JVIM-32-324-s001.pdf [file JVIM-32-324-s001.pdf]

**Supplemental Table 1.** Average reads per sample and sequencing analysis summary in dog datasets.

|       | Total Reads (A) | Remove low quality reads (B) | Collapse to unique reads (C) | Host filter (D) |
|-------|-----------------|------------------------------|------------------------------|-----------------|
| RNA   | 11809496        | 8753321 (74.1%)              | 1908559 (16.2%)              | 148828 (1.3%)   |
| DNA   | 11311839        | 10258980 (90.7%)             | 8470962 (74.9%)              | 359062 (3.2%)   |
| Total | 11560668        | 9506151 (82.2%)              | 5189760 (44.9%)              | 253945 (2.2%)   |

The average number of sequences generated per canine sample was calculated for all RNA-derived and DNA-derived libraries, as well as the total average depth per sample (RNA and DNA together). A) Average number of initial reads. B) Average number of reads remaining after removing low quality sequences. C) Average number of reads remaining after collapsing non-unique sequences into a single read. D) Average number of reads remaining after removing host-derived sequences.

**Supplemental Table 2.** Positive control sequencing summary.

| Sample                  | Known infectious agent | Raw reads         | Reads                          |                                |
|-------------------------|------------------------|-------------------|--------------------------------|--------------------------------|
|                         |                        |                   | remaining after host filtering | Number of virus-aligning reads |
| Green tree python (RNA) | Python nidovirus       | $8.7 \times 10^6$ | $6.1 \times 10^5$<br>(7.0%)    | 2077                           |
| Mule deer (DNA)         | Caprine herpesvirus 2  | $2.2 \times 10^7$ | $5.0 \times 10^6$<br>(22.4%)   | 469                            |
| American Crow (RNA)     | West Nile virus        | $7.6 \times 10^6$ | $6.2 \times 10^5$<br>(8.2%)    | 832                            |
| American Robin (RNA)    | West Nile virus        | $1.2 \times 10^7$ | $1.9 \times 10^5$<br>(1.5%)    | 0                              |

Positive control samples that had been previously sequenced using either metagenomic NGS (python and deer) or targeted NGS (crow and robin) were used to validate our sequencing pipeline. Expected results were based on the known viral agents previously detected by sequencing. All expected agents were detected during this metagenomic NGS study, except within the robin, which was later confirmed WNV positive by PCR. The total # of raw reads in each dataset, the number of reads remaining after filtering, and the number of unique individual sequences that aligned to the known agent are provided. NGS, next generation sequencing.
